# Supplementary material for: Yokukansan Alleviates Cancer Pain by Suppressing Matrix Metalloproteinase-9 in a Mouse Bone Metastasis Model
Source: Evid Based Complement Alternat Med. 2019 May 26;2019:2956920. doi: 10.1155/2019/2956920 (PMC6556276; doi:10.1155/2019/2956920)
Supplement: Supplementary Materials — Sup.Table 1: time courses of cancer pain assessed by DWB. Sup.Table 2: dose dependencies of YKS. Sup.Table 3: effect of daily oral YKS. Sup.Table 4: the effect of i.t. or i.p. injection of saline, MMP-2 inhibitor, or MMP-9 inhibitor. Sup.Table 5: RT-PCR analysis. Sup.Table 6: immunostaining in the spinal cord. [file 2956920.f1.xlsx]

## Sheet: Sup1
Sup.Table 1.Time courses of cancer pain assessed by DWB
Weight (g)
	day 0		day 3		day 5		day 7		day 10		day 14
	Contra	Ipsi	Contra	Ipsi	Contra	Ipsi	Contra	Ipsi	Contra	Ipsi	Contra	Ipsi
Mean	7.73833	8.62167	8.67333	6.37	10.9433	3.51667	11.14	4.49167	11.725	3.89	5.71	8.31167
SD	1.45299	1.02063	2.06997	1.82391	1.35921	1.21246	1.36738	2.13168	1.70028	0.871512	1.60921	1.99978
P value	0.292		0.042		<0.001		<0.001		<0.001		<0.001
Surface (mm2)
	day0		day3		day5		day7		day10		day14
	Contra	Ipsi	Contra	Ipsi	Contra	Ipsi	Contra	Ipsi	Contra	Ipsi	Contra	Ipsi
Mean	5.74833	5.94	6.24167	5.32833	6.71833	2.69667	6.50333	2.92333	6.13	2.39333	2.995	4.51667
SD	1.1619	0.389615	0.975746	0.809226	0.795894	1.3952	0.692018	1.39981	0.688912	0.580335	0.661835	0.523694
P value	0.733		0.046		<0.001		<0.001		<0.001		<0.001
Weight R/L Ratio
	day0	day3	day5	day7	day10	day14
Mean	1.18686	0.746758	0.336927	0.42774	0.340428	1.62814
SD	0.403425	0.18339	0.15113	0.226009	0.0965331	0.799621
P value		0.042	<0.001	<0.001	<0.001	0.296
Surface R/L Ratio
	day0	day3	day5	day7	day10	day14
Mean	1.08358	0.87967	0.391522	0.459278	0.396412	1.59627
SD	0.251153	0.202314	0.163704	0.216016	0.112031	0.442899
P value		0.048	<0.001	<0.001	<0.001	0.052

## Sheet: Sup2
Sup.Table 2.Dose dependencies of YKS
Weight R/L Ratio
	Control	saline	0.1mg	1mg	10mg	single shot
Mean	0.985943	0.42774	0.413707	0.41957	0.948365	0.533894
SD	0.108833	0.226009	0.318418	0.0801884	0.306295	0.165003
P value (vs Control)		<0.001	<0.001	<0.001	0.801
P value (vs saline)	<0.001		0.938	0.941	0.012	0.416
Surface R/L Ratio
	Control	saline	0.1mg	1mg	10mg	single shot
Mean	0.980721	0.459278	0.287385	0.454094	0.992425	0.63808
SD	0.124567	0.216016	0.133334	0.101187	0.223684	0.177548
P value (vs Control)		<0.001	<0.001	<0.001	0.557
P value (vs saline)	<0.001		0.161	0.962	0.032	0.183

## Sheet: Sup3
Sup.Table3.Effect of daily oral YKS
Weight R/L Ratio
	day0			day3			day5			day7
	saline	control	YKS	saline	control	YKS	saline	control	YKS	saline	control	YKS
Mean	1.18686	1.08267	1.01912	0.746758	1.07885	0.74062	0.336927	1.05614	0.944383	0.42774	0.985943	0.948365
SD	0.403425	0.07356	0.121063	0.18339	0.130842	0.32108	0.15113	0.104678	0.130049	0.226009	0.108833	0.306295
P value (vs saline)		0.583	0.394		0.08	0.971		<0.001	<0.001		<0.001	<0.001
Surface R/L Ratio
	day0			day3			day5			day7
	saline	control	YKS	saline	control	YKS	saline	control	YKS	saline	control	YKS
Mean	1.08358	1.0602	1.03958	0.87967	1.04084	0.854256	0.391522	0.998868	0.918336	0.459278	0.980721	0.992425
SD	0.251153	0.0663611	0.0743284	0.202314	0.0913704	0.202036	0.163704	0.0926238	0.111559	0.216016	0.124567	0.223684
P value (vs saline)		0.845	0.715		0.136	0.846		<0.001	<0.001		<0.001	<0.001

## Sheet: Sup4
Sup.Table4.The effect of i.t. or i.p. injection of saline,MMP-2 inhibitor or MMP-9 inhibitor
i.p.injection
Weight R/L Ratio																Surface R/L Ratio
	0hr			1hr			3hr			6hr							0hr			1hr			3hr			6hr
	saline	MMP2	MMP9	saline	MMP2	MMP9	saline	MMP2	MMP9	saline	MMP2	MMP9					saline	MMP2	MMP9	saline	MMP2	MMP9	saline	MMP2	MMP9	saline	MMP2	MMP9
Mean	0.233975	0.244905	0.188096	0.173474	0.293409	0.51721	0.115955	0.213755	0.431069	0.144467	0.180327	0.401025				Mean	0.27737	0.295462	0.234755	0.212242	0.350319	0.587576	0.133021	0.269321	0.484412	0.163753	0.203223	0.457875
SD	0.061208	0.073914	0.035181	0.054627	0.118792	0.156826	0.047094	0.086298	0.142915	0.137886	0.059817	0.112288				SD	0.057139	0.09009	0.039365	0.061302	0.125986	0.167001	0.049397	0.102371	0.147802	0.157272	0.061935	0.108281
P value (vs saline)		0.804	0.177		0.067	<0.001		0.051	<0.001		0.61	<0.001				P value (vs saline)		0.712	0.2		0.052	<0.001		0.072	<0.001		0.612	0.006
i.t.injection
Weight R/L Ratio																Surface R/L Ratio
	0hr			1hr			3hr			6hr							0hr			<			3hr			6hr
	saline	MMP2	MMP9	saline	MMP2	MMP9	saline	MMP2	MMP9	saline	MMP2	MMP9					saline	MMP2	MMP9	saline	MMP2	MMP9	saline	MMP2	MMP9	saline	MMP2	MMP9
Mean	0.246626	0.138873	0.141798	0.231112	0.126273	0.482427	0.120222	0.141289	0.572198	0.134083	0.087597	0.57548				Mean	0.320787	0.153086	0.160444	0.268486	0.162417	0.618738	0.146566	0.176149	0.614457	0.145657	0.109974	0.583871
SD	0.104876	0.123876	0.055596	0.083707	0.069001	0.174169	0.047438	0.116723	0.226858	0.141024	0.080791	0.314842				SD	0.150039	0.12287	0.052922	0.106305	0.083732	0.271812	0.065168	0.110602	0.268793	0.140173	0.091243	0.305646
P value (vs saline)		0.169	0.077		0.056	0.016		0.716	<0.001		0.537	<0.001				P value (vs saline)		0.081	0.052		0.11	0.023		0.618	<0.001		0.644	<0.001

## Sheet: Sup5
Sup.Table 5.Real-time PCR analysis
Right tibia
MMP-2											MMP-9
	Day 0		Day 3		Day 5		Day 7						Day 0		Day 3		Day 5		Day 7
	Saline	YKS	Saline	YKS	Saline	YKS	Saline	YKS					Saline	YKS	Saline	YKS	Saline	YKS	Saline	YKS
Mean	11.3753	12.1076	12.3227	11.7382	11.6959	11.7029	11.9589	12.668				Mean	1.86666	1.7176	2.48175	1.81977	1.66922	1.79913	1.66647	1.786
SD	2.50385	2.43215	2.63305	2.33423	0.9898	2.30582	4.95482	3.50426				SD	0.289881	0.202516	0.599512	0.36361	0.268128	0.45838	0.180712	0.250238
P value	0.619		0.693		0.995		0.781					P value	0.329		0.049		0.562		0.365
Spinal cord
MMP-2	Day 0				Day 3				Day 5				Day 7
	Left		Right		Left		Right		Left		Right		Left		Right
	Saline	YKS	Saline	YKS	Saline	YKS	Saline	YKS	Saline	YKS	Saline	YKS	Saline	YKS	Saline	YKS
Mean	48.9781	39.9336	112.815	23.8657	43.5343	175.749	16.7579	90.9325	55.4429	111.427	45.1921	105.388	18.179	28.8874	92.0032	32.3057
SD	11.3663	9.36014	98.7771	6.48998	13.2337	106.992	0.508791	38.0035	13.8202	65.5323	29.8251	4.50545	19.5775	10.39	96.6668	24.618
MMP-9	Day 0				Day 3				Day 5				Day 7
	Left		Right		Left		Right		Left		Right		Left		Right
	Saline	YKS	Saline	YKS	Saline	YKS	Saline	YKS	Saline	YKS	Saline	YKS	Saline	YKS	Saline	YKS
Mean	4.01057	1.54574	3.96084	0.986049	3.12632	1.31358	5.23919	3.19204	3.56875	1.14552	3.87649	1.36656	1.97802	2.05923	23.1844	2.48112
SD	1.50264	0.66866	1.8255	0.341479	1.32841	0.633943	1.93205	0.98322	0.325074	0.20217	1.59895	0.243784	0.607307	0.485082	17.286	1.56421

## Sheet: Sup6
Sup.Table 6.Immunostaining in the spinal cord
MMP-2							MMP-9
	saline		YKS					saline		YKS
	Contra	Ipsi	Contra	Ipsi				Contra	Ipsi	Contra	Ipsi
Mean	0.666667	0.666667	0.666667	0.666667			Mean	0.666667	4.33333	0.333333	0.666667
SD	0.471405	0.471405	0.471405	0.471405			SD	0.942809	1.24722	0.471405	0.471405
P value (vs Contra)	1		1				P value (vs Contra)	0.029		0.519
	Contra		Ipsi					Contra		Ipsi
	saline	YKS	saline	YKS				saline	YKS	saline	YKS
Mean	0.666667	0.666667	0.666667	0.666667			Mean	0.666667	0.333333	4.33333	0.666667
SD	0.471405	0.471405	0.471405	0.471405			SD	0.942809	0.471405	1.24722	0.471405
P value (vs saline)	1		1				P value (vs saline)	0.373		0.013
